# Supplementary material
Source: publisher figshare collection journal article supplement (https://tandf.figshare.com/articles/dataset/_/4769398)
Supplement: Supplementary file 2 [file 2]

Archive with 2 entries (2 files):
- ijmf_a_1300650_sm2146.pdf
- ijmf_a_1300650_sm3193.pdf
